# Supplementary material
Source: Research Square preprint supplement (doi:10.21203/rs.3.rs-8219831/v1)
Supplement: Supplementary file 2 [file a5c7369382faec4e9a80443f.pdf]

Journal Name:

Manuscript Number:

Manuscript Title:

Corresponding Author(s):

In the interests of transparency and to help readers form their own judgements of potential bias, *Nature Portfolio* journals require authors to declare any competing financial and/or non-financial interests in relation to the work described in the submitted manuscript. The corresponding author is responsible for submitting a competing financial interests statement on behalf of all authors of the paper.

## Financial competing interests

**No**, I declare the authors have no competing interests as defined by Nature Portfolio, or other interests that might be perceived to influence the interpretation of the article.

**Yes**, I declare the authors have competing interests as defined by Nature Portfolio, or other interests that might be perceived to influence the interpretation of the article.

*If yes, please specify your competing interests in the box below, followed by the initials of the relevant author(s).*

## Funding

Research support to the author or their institution (including salaries, equipment, supplies and other expenses) by organizations that may gain or lose financially through this publication. A specific role for the funder in the conceptualization, design, data collection, analysis, decision to publish, or preparation of the manuscript, should be disclosed.

## Employment

Recent (while engaged in the research project), present or anticipated employment by any organization that may gain or lose financially through this publication.

## Personal financial interests

Stocks or shares in companies that may gain or lose financially through publication; consultation fees or other forms of remuneration (including reimbursement for attending symposia) from organizations that may gain or lose financially; patents or patent applications (awarded or pending) filed by the authors or their institutions whose value may be affected by publication. For patents and patent applications, disclosure of the following information is requested: patent applicant (whether author or institution), name of inventor(s), application number, status of application, specific aspect of manuscript covered in patent application.

**Describe relevant competing interests below:**

---

## Non-financial competing interests

**No**, I declare the authors have no non-financial competing interests as defined by Nature Portfolio, or other interests that might be perceived to influence the interpretation of the article.

**Yes**, I declare the authors have competing interests as defined by Nature Portfolio, or other interests that might be perceived to influence the interpretation of the article.

***If yes, please specify your competing interests in the box below, followed by the initials of the relevant author(s).***

Non-financial competing interests can take different forms, including personal or professional relations with organizations and individuals. We would encourage authors and referees to declare any unpaid roles or relationships that might have a bearing on the publication process. Examples of non-financial competing interests include (but are not limited to):

- Unpaid membership in a government or non-governmental organization
- Unpaid membership in an advocacy or lobbying organization
- Unpaid advisory position in a commercial organization
- Writing or consulting for an educational company
- Acting as an expert witness

***Describe relevant competing interests below:***

I have read Nature Portfolio's competing interest policy and declare that the above information is complete and correct.

Print Name: \_\_\_\_\_

Signature: 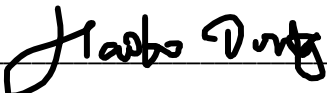 \_\_\_\_\_ Date: \_\_\_\_\_
